# Supplementary material for: Influence of the Main Border Faults on the 3D Hydraulic Field of the Central Upper Rhine Graben
Source: Hindawi journal article supplement (doi:10.1155/2019/7520714), 2019-03-11
Supplement: f1 [file 7520714.f1.pdf]

## Supplementary Material 1: Northern and southern cross sections

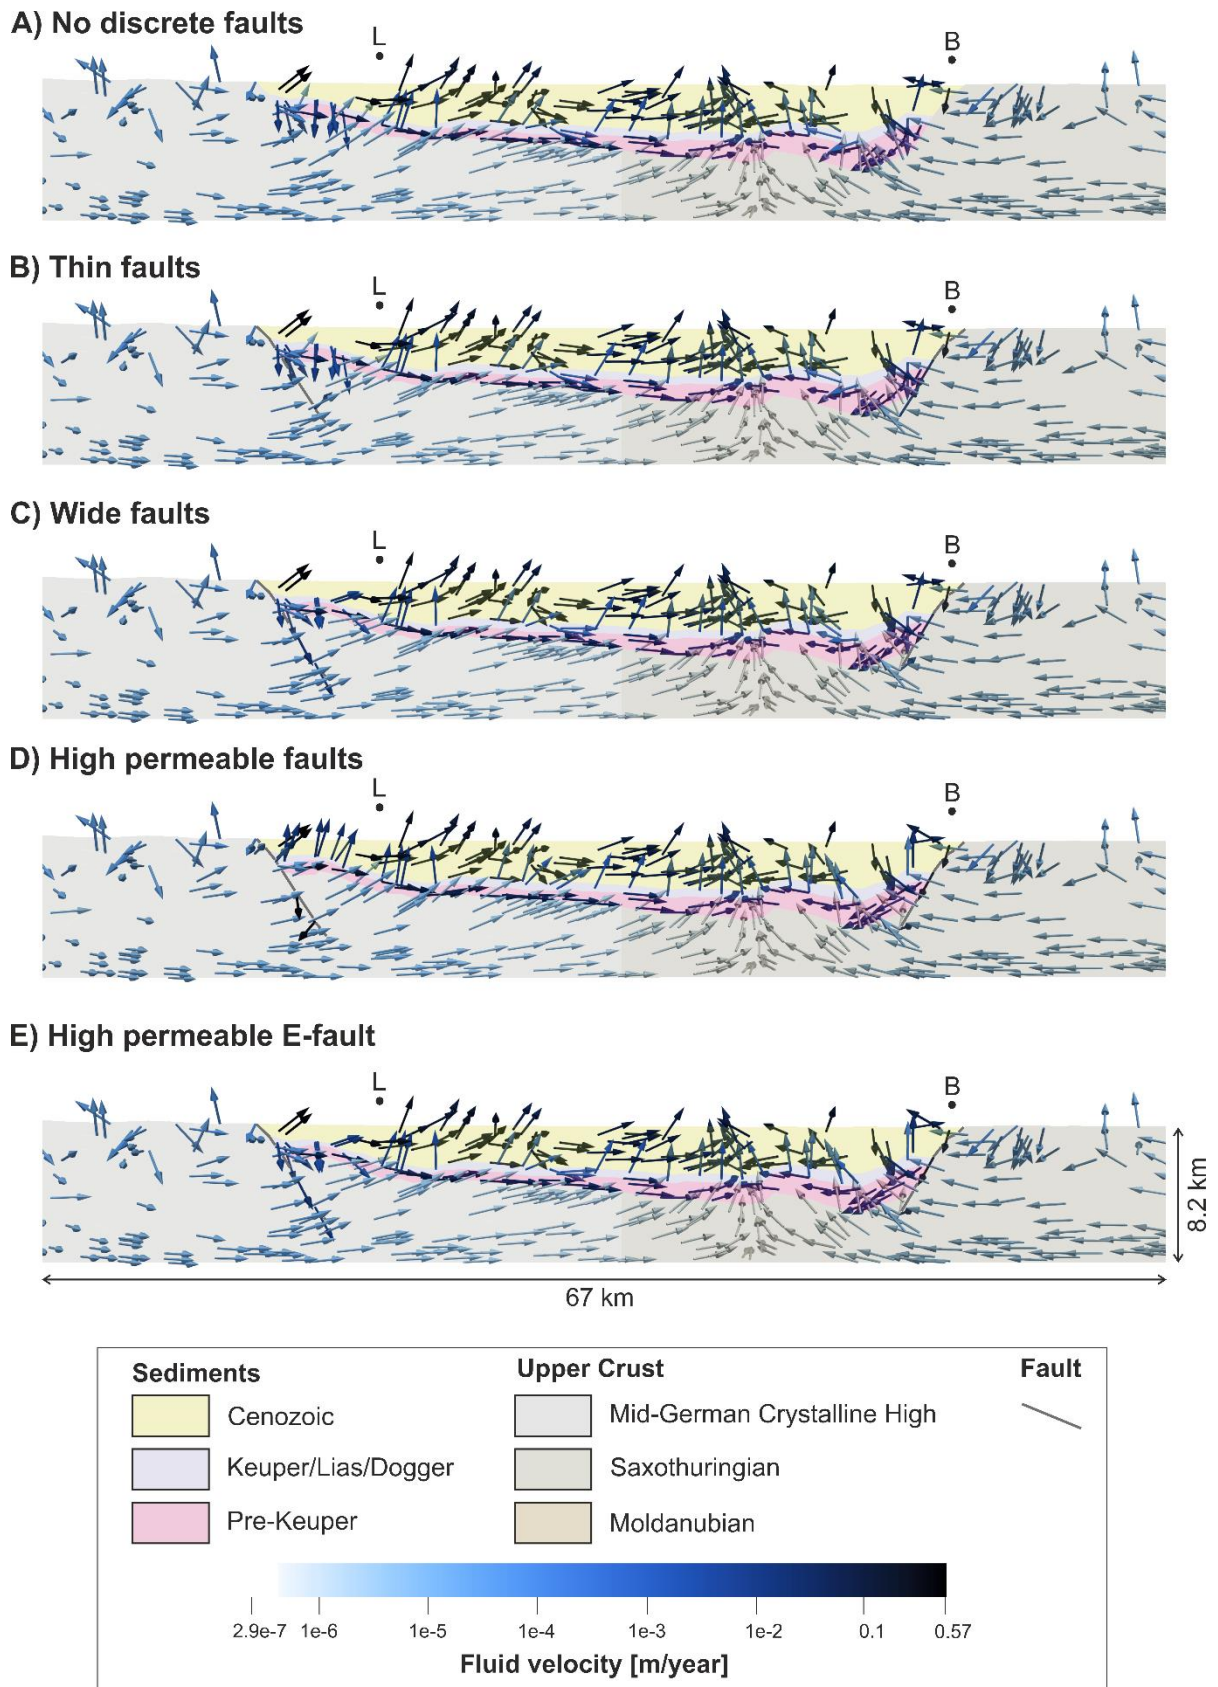

Fig. A1: Fluid flow in the northern model area at Landau (L) and Bruchsal (B) for different simulations (for location compare Fig. 8; for model explanation compare Tab. 2)

**A) No discrete faults**

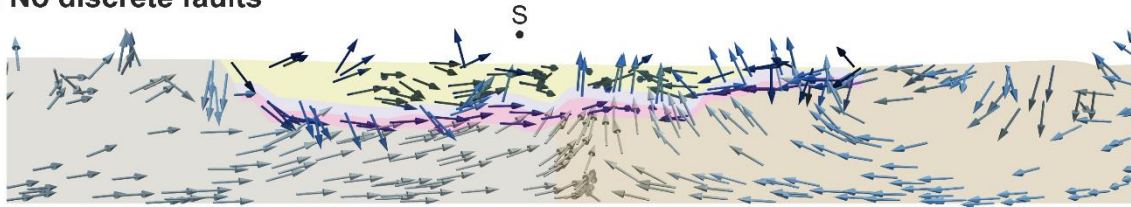

**B) Thin faults**

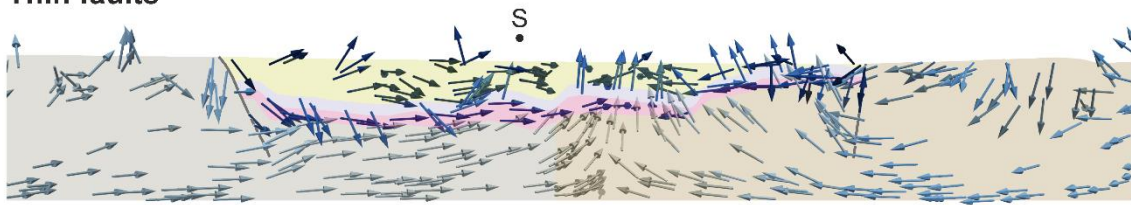

**C) Wide faults**

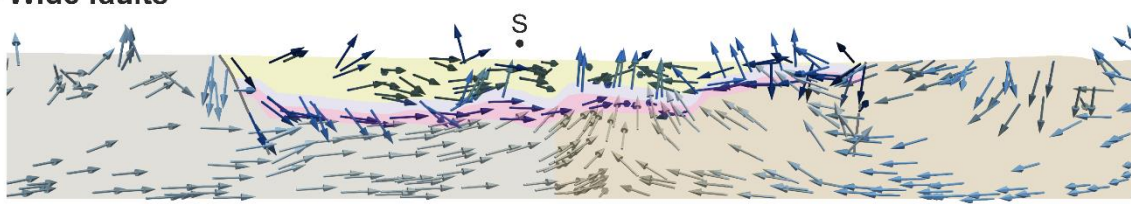

**D) High permeable faults**

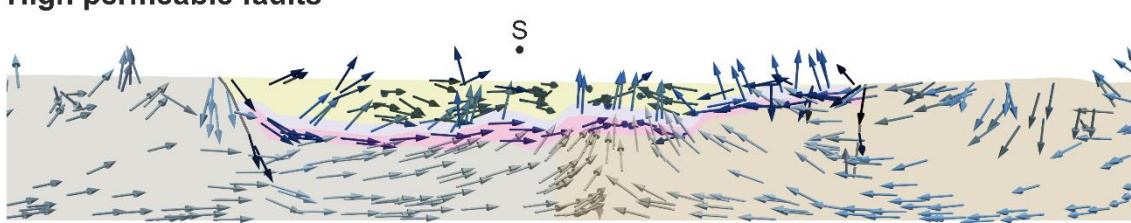

**E) High permeable E-fault**

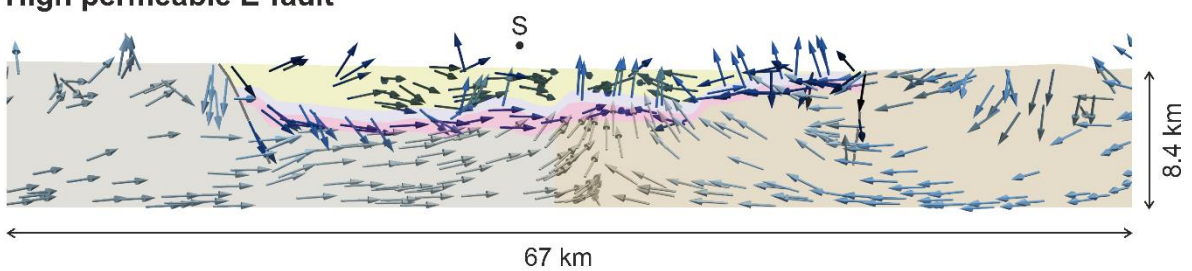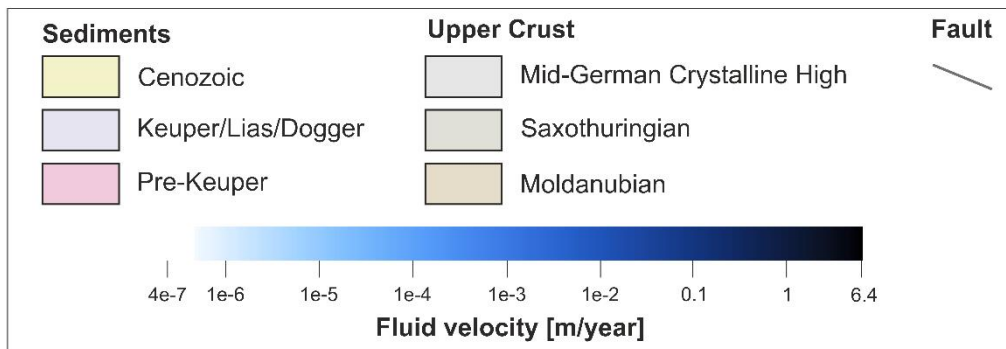

Fig. A2: Fluid flow in the southern model area at Strasbourg (S) for different simulations (for location compare Fig. 8; for model explanation compare Tab. 2)

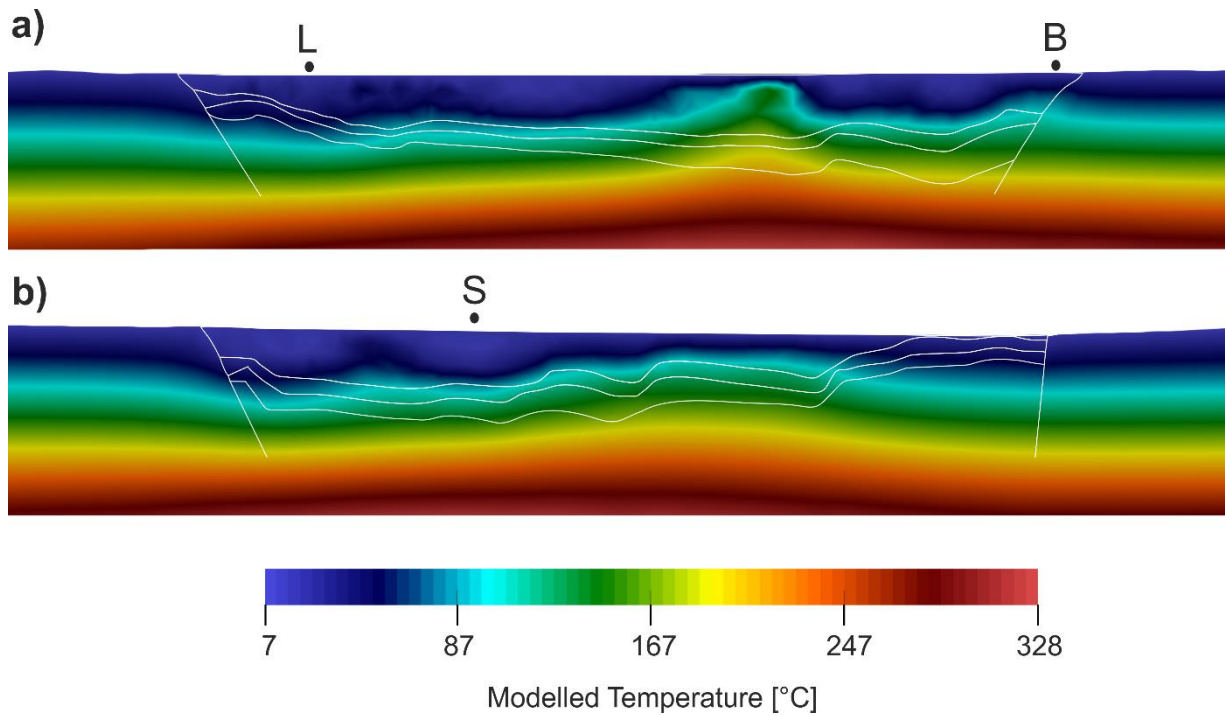

Fig. A3: Simulated temperature for model B (compare Tab. 2) in the (a) northern and (b) southern model area (location of cross sections as for Fig. B1 and B2; L: Landau, B: Bruchsal, S: Strasbourg)
